# Supplementary material
Source: publisher figshare collection journal article supplement (https://gsajournals.figshare.com/ndownloader/files/25472750)
Supplement: Supplementary file 1 [file 25472750]

## Sheet: Table_S1
	Table S1: Primer sequences for cloning and validation of feline MYBPC3.
	Primer Type	Allele	Primer Name	Primer Sequence (5'-3')
	InFusion cloning of feline MyBPC3 to pUASTattb vector	wild-type	MYBPC3-InFusion-Fwd	aacagatctgcggccatgcctgagccggggaag
			MYBPC3-InFusion-Rev	aaagatcctctagagcttgtccagcttccttcc
	Site-directed Mutagenesis	A31P	G91C-MYBPC3-Rev	cgctctgtctcggGctcgaacacagca
			G91C-MYBPC3-Fwd	tgctgtgttcgagCccgagacagagcg
	Site-directed Mutagenesis	R820W	C2458T-MYBPC3-Rev	ttcagccgcatccaccAgaagctcttcttcttc
			C2458T-MYBPC3-Fwd	gaagaagaagagcttcTggtggatgcggctgaa
	RT-PCR	MYBPC3 (all alleles)	MYBPC3-qPCR-Fwd	gtgtaccagagcatcgcaga
			MYBPC3-qPCR-Rev	gtttgtggactcgcccaatg
	Sanger Sequencing	MYBPC3 (all alleles) - pUASTattb vector specific primers	pUAST-Fwd	aaccaagtaaatcaactgc
			pUAST-Rev	atctctgtaggtagtttgtc
	Sanger Sequencing	MYBPC3 (all alleles) - internal MYBPC3 primers	MYBPC3-573-Fwd	ccacaaactgaccattgacg
			MYBPC3-573-Rev	caggagtcctcacccacatt
	Bases in red font refer to the nucleotide change necessary to generate the A31P mutation (GCC to CCC) and R820W mutation (CGG to TGG).
